# Supplementary material
Source: Royal Society of Chemistry journal article supplement (doi:10.1039/d6ma00390g)
Supplement: d6ma00390g1.pdf [file d6ma00390g1.pdf]

## **Optimizing Silver Incorporation in MnO<sub>x</sub> Air Cathodes to Balance Power Density and Cycling Stability in Rechargeable Zn–Air Batteries**

Saloua Merazga,<sup>1,2</sup> Yahia Chelali,<sup>1</sup> Fatahine Mohamed,<sup>1</sup> Alonso Moreno Zuria<sup>1</sup>, Christophe Chabanier<sup>1</sup> and Mohamed Mohamedi<sup>1</sup>

<sup>1</sup>Institut National de la Recherche Scientifique (INRS)-Énergie, Matériaux et Télécommunications (EMT), 1650 Boulevard Lionel Boulet, Varennes, Québec, J3X 1P7, Canada. Email: [Mohamed.Mohamedi@inrs.ca](mailto:Mohamed.Mohamedi@inrs.ca)

<sup>2</sup>Centre de Recherche en Technologie des Semi-Conducteurs pour l'Énergétique (CRTSE), Bd Frantz Fanon, P.O. Box 140, Alger-7 Merveilles, Algiers DZ-16038, Algeria.

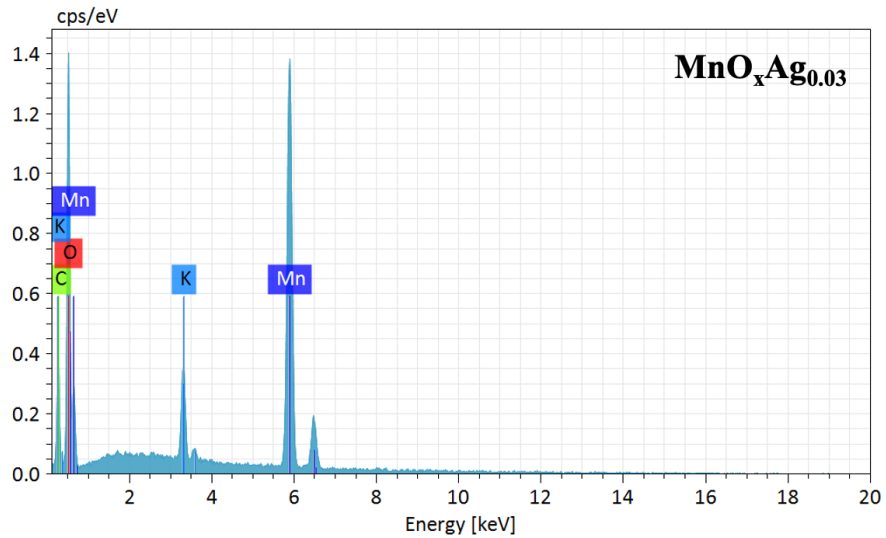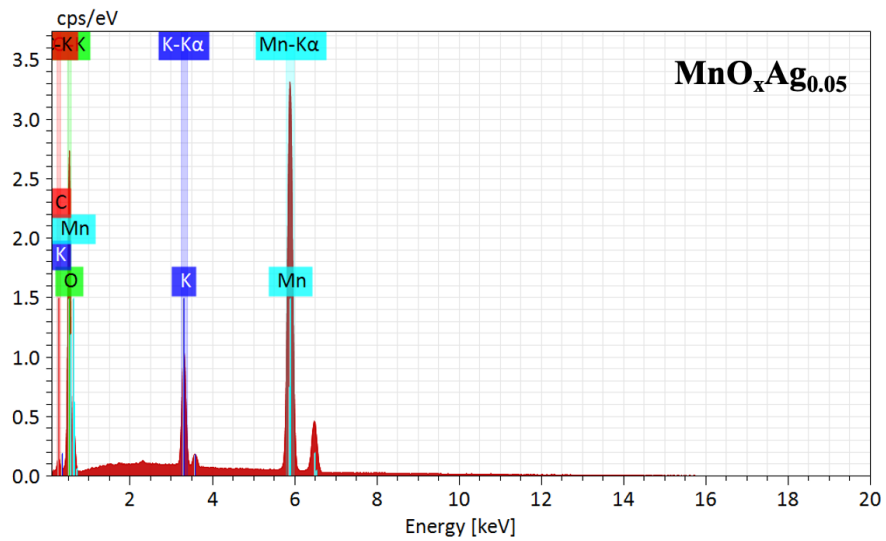

Figure S1 EDS scans of  $\text{MnO}_x\text{Ag}_{0.03}$  (top) and  $\text{MnO}_x\text{Ag}_{0.05}$  (bottom).

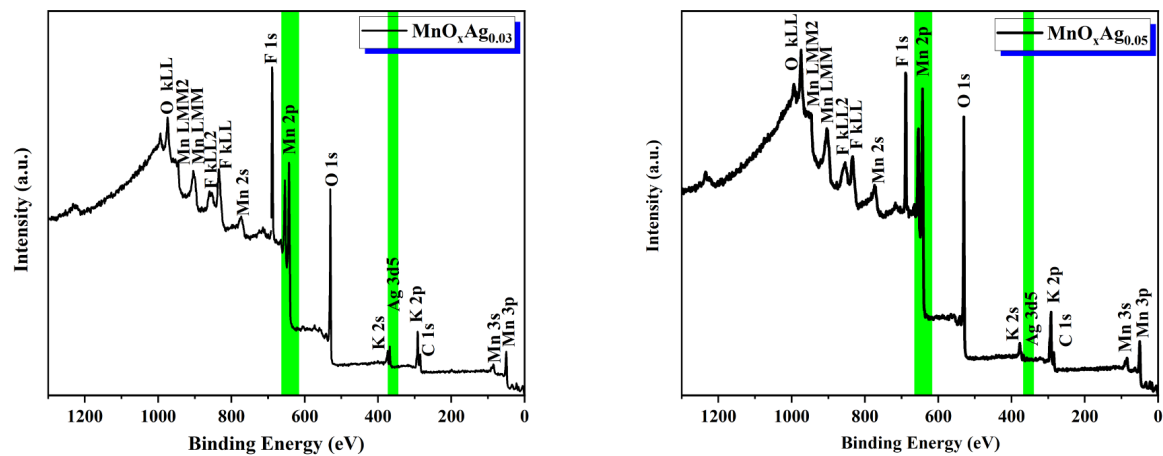

**Figure S2** XPS survey scans of  $\text{MnO}_x\text{Ag}_{0.03}$  (left) and  $\text{MnO}_x\text{Ag}_{0.05}$  (right).

**Table S1.** Fitted electrochemical impedance parameters for CP/MnOx, CP/ MnOxAg<sub>0.03</sub>, and CP/ MnOxAg<sub>0.05</sub> before and after cycling

| Sample                 | State  | Circuit                                                                         | R <sub>s</sub> (Ω) | R <sub>1</sub> (Ω) | Q <sub>1</sub> (S·s <sup>n1</sup> ) | n1    | R <sub>2</sub> (Ω) | Q <sub>2</sub> (S·s <sup>n2</sup> ) | n2    |
|------------------------|--------|---------------------------------------------------------------------------------|--------------------|--------------------|-------------------------------------|-------|--------------------|-------------------------------------|-------|
| MnOx                   | Before | R <sub>s</sub> (R <sub>1</sub> Q <sub>1</sub> )(R <sub>2</sub> Q <sub>2</sub> ) | 5.81               | 3.50               | 1.72×10 <sup>-5</sup>               | 0.907 | 308                | 5.30×10 <sup>-2</sup>               | 0.22  |
| MnOx                   | After  | R <sub>s</sub> (R <sub>1</sub> Q <sub>1</sub> )(R <sub>2</sub> Q <sub>2</sub> ) | 10.7               | 4.56               | 1.08×10 <sup>-4</sup>               | 0.764 | 138                | 2.38×10 <sup>-2</sup>               | 0.378 |
| MnOxAg <sub>0.03</sub> | Before | R <sub>s</sub> (R <sub>1</sub> Q <sub>1</sub> )                                 | 11.9               | 932                | 5.09×10 <sup>-3</sup>               | 0.661 | —                  | —                                   | —     |
| MnOxAg <sub>0.03</sub> | After  | R <sub>s</sub> (R <sub>1</sub> Q <sub>1</sub> )                                 | 15.8               | 971                | 5.0×10 <sup>-3</sup>                | 0.628 | —                  | —                                   | —     |
| MnOxAg <sub>0.05</sub> | Before | R <sub>s</sub> (R <sub>1</sub> Q <sub>1</sub> )(R <sub>2</sub> Q <sub>2</sub> ) | 6.34               | 27                 | 1.67×10 <sup>-4</sup>               | 0.810 | 0.93               | 3.8×10 <sup>-3</sup>                | 0.651 |
| MnOxAg <sub>0.05</sub> | After  | R <sub>s</sub> (R <sub>1</sub> Q <sub>1</sub> )(R <sub>2</sub> Q <sub>2</sub> ) | 4.49               | 3.31               | 6.21×10 <sup>-4</sup>               | 1.0   | 132                | 3.43×10 <sup>-4</sup>               | 0.266 |

**Table S2** Electrochemical Zn-air battery performance comparison with literature reports.

| Catalyst                                              | Electrode structure | Voltage gap (V)              | RTE (%) | Cycles   | Power density (mW cm <sup>-2</sup> ) | Ref       |
|-------------------------------------------------------|---------------------|------------------------------|---------|----------|--------------------------------------|-----------|
| CP/MnO <sub>x</sub> Ag <sub>0.03</sub>                | Binderless          | 1.09                         | 50.6    | 300      | 18.9                                 | This work |
| CPMnO <sub>x</sub> Ag <sub>0.05</sub>                 | Binderless          | 1.32                         | 40.3    | 300      | 39.1                                 | This work |
| CP/MnO <sub>2</sub>                                   | Binderless          | 1.5                          | 37.5    | 300      | 21.9                                 | This work |
| CNT/MnO <sub>2</sub>                                  | Binderless          | 1.0                          | 52.2    | 100      | 15                                   | 1         |
| CSC/MnO <sub>2</sub>                                  | Binderless          | 1.18                         | 42.4    | 100      | 14.8                                 | 2         |
| Ag/Ag <sub>2</sub> O@MCOF(Co)                         | Composite           | 1.02 (1 <sup>st</sup> cycle) | NA      | 100      | 170.8                                | 3         |
| 1.5FeNi@NCNT                                          | Composite           | 1.1                          | NA      | 100      | 114                                  | 4         |
| Co/N/S-CNPs                                           | Composite           | 0.9                          | 60      | 40 hours | 96.6                                 | 5         |
| Co <sub>3</sub> O <sub>4</sub> -NC&Ag                 | Composite           | 0.9                          | NA      | NA       | 198                                  | 6         |
| Ag <sub>50</sub> Cu <sub>50</sub>                     | Binderless          | 0.9                          | 56.4    | 100      | 86.5                                 | 7         |
| Pt/C+IrO <sub>2</sub>                                 | Composite           | 1.28                         | 31.9    | 60       | 46.6                                 | 8         |
| NiCo <sub>2</sub> O <sub>4</sub> /MC-HTO <sub>2</sub> | Composite           | 1.18                         | 45.6    | 100      | 36.9                                 | 9         |
| Pt-Ru/C                                               | Composite           | 0.73                         | 62.81   | 100      | 84.73                                | 9         |

**References:**

1. Xiaoying Zheng et al., ACS Appl. Mater. Interfaces 2021, 13, 61374–61385.
2. Xiaoying Zheng et al., Inorg. Chem. 2023, 62, 989–1000.
3. Minghua Wang Changba Wang et al. ACS Sustainable Chem. Eng. 2021, 9, 17, 5872–5883.
4. Mengchen Wu, Bingkun Guo, Anmin Nie, Rui Liu, J. Colloid. Interface Sci. 2020, 561, 585-592.
5. Shujun Chao, Ge Wang, Dezhong Xu, Yingling Wang, Int. J. of Hydrog. Energy, 2018, 43, 11012-11021.
6. Leng, P.; Wang, H.; Wu, B.; Zhao, L.; Deng, Y.; Cui, J.; Wan, H.; Lv, L. Sustainability 2022, 14, 13417.
7. Jin, Y., Chen, F., Lei, Y. and Wu, X. (2015), ChemCatChem 2015, 7, 2377-2383.
8. Xiaoying Zheng et al., ACS Electrochem. 2025, 1, 216-229.
9. Critian Díaz et al., J. Energy Storage, 2025, 126, 117099.
